# Supplementary material
Source: PubMed Central journal article supplement (PMC2684200)
Supplement: ajpath.2009.081057_1.pdf [file ajpath.2009.081057_1.pdf]

| AffyID      | Gene Name | Dataset 1     |        |                 |        |            |       |              | Dataset 2     |        |                 |        |            |       |              | Heatmap Order*** |
|-------------|-----------|---------------|--------|-----------------|--------|------------|-------|--------------|---------------|--------|-----------------|--------|------------|-------|--------------|------------------|
|             |           | Benign (n=18) |        | Melanoma (n=45) |        | t          | p     | Adjusted p** | Benign (n=14) |        | Melanoma (n=19) |        | t          | p     | Adjusted p** |                  |
|             |           | Mean          | StdDev | Mean            | StdDev | Statistic* |       |              | Mean          | StdDev | Mean            | StdDev | Statistic* |       |              |                  |
| 200632_s_at | NDRG1     | 9351          | 2607.3 | 3034            | 1645.3 | 12.0       | 0.000 | 0.000        | 1822          | 547.0  | 1633            | 1138.3 | 1.7        | 0.099 | 0.160        | 1                |
| 200799_at   | HSPA1A    | 7905          | 6091.0 | 7391            | 4584.4 | 0.2        | 0.879 | 0.914        | 2149          | 594.8  | 1777            | 1335.8 | 2.2        | 0.035 | 0.069        | 2                |
| 212566_at   | MAP4      | 3901          | 1910.8 | 4954            | 1912.9 | -1.9       | 0.068 | 0.121        | 1622          | 388.3  | 868             | 325.6  | 5.4        | 0.000 | 0.000        | 3                |
| 201041_s_at | DUSP1     | 7254          | 6239.4 | 2094            | 3425.6 | 6.2        | 0.000 | 0.000        | 2253          | 1266.3 | 1126            | 805.4  | 3.1        | 0.004 | 0.010        | 4                |
| 209189_at   | FOS       | 3648          | 4803.0 | 1548            | 2654.2 | 1.4        | 0.167 | 0.241        | 1386          | 1173.8 | 734             | 559.3  | 1.5        | 0.145 | 0.219        | 5                |
| 200766_at   | CTSD      | 1030          | 442.4  | 2115            | 1321.2 | -4.0       | 0.001 | 0.002        | 176           | 46.8   | 466             | 250.3  | -6.1       | 0.000 | 0.000        | 6                |
| 202431_s_at | MYC       | 2137          | 1068.4 | 1780            | 795.7  | 1.3        | 0.194 | 0.275        | 281           | 132.0  | 283             | 259.1  | 1.0        | 0.325 | 0.422        | 7                |
| 200800_s_at | HSPA1A    | 2696          | 608.8  | 3341            | 3736.9 | -0.3       | 0.785 | 0.839        | 440           | 126.0  | 764             | 887.9  | -1.2       | 0.246 | 0.331        | 8                |
| 243_g_at    | MAP4      | 2667          | 1181.8 | 2883            | 845.5  | -1.0       | 0.318 | 0.407        | 533           | 72.2   | 455             | 153.6  | 2.3        | 0.031 | 0.064        | 9                |
| 200989_at   | HIF1A     | 2230          | 1349.1 | 2398            | 586.5  | -1.4       | 0.166 | 0.241        | 972           | 318.8  | 842             | 365.8  | 1.3        | 0.192 | 0.273        | 10               |
| 202284_s_at | CDKN1A    | 1397          | 566.4  | 2791            | 1266.7 | -6.0       | 0.000 | 0.000        | 854           | 380.6  | 790             | 425.4  | 0.6        | 0.522 | 0.594        | 11               |
| 208796_s_at | CCNG1     | 2304          | 1001.8 | 1601            | 802.0  | 3.4        | 0.001 | 0.004        | 782           | 236.4  | 677             | 259.5  | 1.5        | 0.151 | 0.223        | 12               |
| 205548_s_at | BTG3      | 1166          | 365.1  | 1240            | 309.1  | -1.0       | 0.328 | 0.412        | 467           | 203.9  | 377             | 223.9  | 1.5        | 0.138 | 0.212        | 13               |
| 213134_x_at | BTG3      | 1683          | 685.8  | 1883            | 528.6  | -1.6       | 0.125 | 0.194        | 506           | 223.5  | 382             | 222.2  | 1.9        | 0.063 | 0.110        | 14               |
| 200836_s_at | MAP4      | 1195          | 618.2  | 1221            | 274.5  | -1.1       | 0.307 | 0.399        | 181           | 30.6   | 214             | 52.5   | -1.9       | 0.070 | 0.120        | 15               |
| 219628_at   | WIG1      | 824           | 453.3  | 1077            | 349.2  | -2.2       | 0.038 | 0.074        | 221           | 83.6   | 285             | 184.0  | -0.9       | 0.374 | 0.461        | 16               |
| 203010_at   | STAT5A    | 954           | 309.4  | 998             | 194.6  | -0.9       | 0.376 | 0.451        | 317           | 103.9  | 351             | 108.2  | -0.9       | 0.384 | 0.456        | 17               |
| 211040_x_at | GTSE1     | 1130          | 679.0  | 979             | 293.7  | 0.3        | 0.745 | 0.818        | 262           | 34.5   | 256             | 43.8   | 0.5        | 0.600 | 0.663        | 18               |
| 209361_s_at | PCBP4     | 837           | 210.5  | 1136            | 327.1  | -3.2       | 0.002 | 0.005        | 169           | 27.7   | 234             | 60.0   | -3.6       | 0.001 | 0.003        | 19               |
| 212567_s_at | MAP4      | 1139          | 369.0  | 1531            | 482.4  | -2.5       | 0.015 | 0.036        | 432           | 108.3  | 323             | 101.9  | 2.9        | 0.007 | 0.018        | 20               |
| 33850_at    | MAP4      | 870           | 331.5  | 1105            | 364.6  | -1.8       | 0.071 | 0.124        | 285           | 70.7   | 200             | 61.5   | 3.6        | 0.001 | 0.003        | 21               |
| 203685_at   | BCL2      | 920           | 358.5  | 1043            | 314.1  | -1.5       | 0.146 | 0.219        | 379           | 231.3  | 236             | 155.7  | 2.5        | 0.017 | 0.037        | 22               |
| 209295_at   | TNFRSF10B | 562           | 162.2  | 1132            | 418.7  | -5.5       | 0.000 | 0.000        | 148           | 51.0   | 200             | 144.8  | -1.0       | 0.344 | 0.439        | 23               |
| 202705_at   | CCNB2     | 324           | 138.5  | 1090            | 513.8  | -8.1       | 0.000 | 0.000        | 162           | 22.1   | 332             | 225.0  | -4.0       | 0.001 | 0.002        | 24               |
| 221577_x_at | GDF15     | 190           | 159.8  | 5223            | 2960.0 | -19.0      | 0.000 | 0.000        | 42            | 33.8   | 903             | 852.8  | -6.8       | 0.000 | 0.000        | 25               |
| 33322_i_at  | SFN       | 56422         | 29438  | 6363            | 11847  | 10.0       | 0.000 | 0.000        | 10843         | 3354.9 | 1583            | 3316.6 | 10.2       | 0.000 | 0.000        | 26               |
| 33323_r_at  | SFN       | 39979         | 30742  | 4221            | 8366.0 | 9.6        | 0.000 | 0.000        | 6241          | 1934.4 | 904             | 1961.0 | 10.1       | 0.000 | 0.000        | 27               |
| 200835_s_at | MAP4      | 254           | 168.7  | 202             | 157.0  | 1.2        | 0.229 | 0.308        | 84            | 9.3    | 99              | 15.5   | -3.3       | 0.002 | 0.006        | 28               |
| 206742_at   | FIGF      | 183           | 102.3  | 139             | 65.7   | 0.9        | 0.355 | 0.440        | 73            | 19.9   | 61              | 11.3   | 2.1        | 0.049 | 0.090        | 29               |
| 207005_s_at | BCL2      | 136           | 55.2   | 121             | 68.9   | 0.8        | 0.418 | 0.494        | 82            | 11.4   | 94              | 22.2   | -1.8       | 0.078 | 0.132        | 30               |
| 207004_at   | BCL2      | 138           | 99.3   | 188             | 88.1   | -2.3       | 0.031 | 0.064        | 114           | 12.9   | 114             | 19.9   | 0.1        | 0.920 | 0.933        | 31               |
| 211554_s_at | APAF1     | 162           | 84.4   | 161             | 79.1   | 0.0        | 0.981 | 0.981        | 98            | 13.4   | 116             | 15.7   | -3.7       | 0.001 | 0.002        | 32               |
| 209294_x_at | TNFRSF10B | 206           | 143.3  | 177             | 97.4   | 0.3        | 0.738 | 0.818        | 144           | 21.3   | 149             | 21.9   | -0.7       | 0.509 | 0.593        | 33               |
| 210405_x_at | TNFRSF10B | 186           | 109.6  | 172             | 120.4  | 0.5        | 0.594 | 0.681        | 96            | 19.7   | 109             | 18.3   | -2.2       | 0.036 | 0.069        | 34               |
| 207826_s_at | ID3       | 367           | 412.8  | 133             | 134.6  | 2.9        | 0.007 | 0.019        | 120           | 35.2   | 113             | 84.6   | 1.3        | 0.203 | 0.283        | 35               |

| AffyID      | Gene Name | Dataset 1     |        |                 |        |            |       |              | Dataset 2     |        |                 |        |            |       |              | Heatmap Order*** |
|-------------|-----------|---------------|--------|-----------------|--------|------------|-------|--------------|---------------|--------|-----------------|--------|------------|-------|--------------|------------------|
|             |           | Benign (n=18) |        | Melanoma (n=45) |        | t          | p     | Adjusted p** | Benign (n=14) |        | Melanoma (n=19) |        | t          | p     | Adjusted p** |                  |
|             |           | Mean          | StdDev | Mean            | StdDev | Statistic* |       |              | Mean          | StdDev | Mean            | StdDev | Statistic* |       |              |                  |
| 214511_x_at | FCGR1A    | 170           | 156.1  | 254             | 204.2  | -1.9       | 0.066 | 0.119        | 57            | 9.8    | 161             | 82.7   | -6.9       | 0.000 | 0.000        | 36               |
| 201108_s_at | THBS1     | 467           | 989.9  | 370             | 266.2  | -1.1       | 0.288 | 0.381        | 105           | 22.7   | 117             | 33.9   | -1.1       | 0.289 | 0.382        | 37               |
| 201292_at   | TOP2A     | 293           | 115.0  | 767             | 357.6  | -7.6       | 0.000 | 0.000        | 53            | 18.2   | 140             | 103.2  | -4.7       | 0.000 | 0.000        | 38               |
| 210559_s_at | CDC2      | 297           | 107.8  | 603             | 218.0  | -6.7       | 0.000 | 0.000        | 52            | 8.0    | 136             | 100.2  | -5.2       | 0.000 | 0.000        | 39               |
| 214710_s_at | CCNB1     | 258           | 69.6   | 567             | 186.9  | -7.8       | 0.000 | 0.000        | 49            | 11.0   | 166             | 157.6  | -5.4       | 0.000 | 0.000        | 40               |
| 203213_at   | CDC2      | 192           | 148.4  | 564             | 306.9  | -7.1       | 0.000 | 0.000        | 58            | 11.9   | 91              | 57.6   | -2.8       | 0.009 | 0.019        | 41               |
| 203214_x_at | CDC2      | 232           | 80.6   | 428             | 138.2  | -6.0       | 0.000 | 0.000        | 102           | 21.4   | 156             | 57.7   | -3.8       | 0.001 | 0.002        | 42               |
| 203135_at   | TBP       | 517           | 243.9  | 577             | 158.6  | -1.7       | 0.095 | 0.154        | 102           | 13.7   | 91              | 23.6   | 2.0        | 0.061 | 0.109        | 43               |
| 216347_s_at | PPP1R13B  | 648           | 193.6  | 378             | 76.2   | 6.4        | 0.000 | 0.000        | 167           | 31.4   | 96              | 19.7   | 8.2        | 0.000 | 0.000        | 44               |
| 207813_s_at | FDXR      | 385           | 161.4  | 436             | 168.9  | -1.2       | 0.220 | 0.306        | 91            | 17.7   | 105             | 43.6   | -0.9       | 0.384 | 0.465        | 45               |
| 211692_s_at | BBC3      | 524           | 171.4  | 682             | 264.7  | -2.2       | 0.032 | 0.064        | 137           | 22.9   | 166             | 43.2   | -2.1       | 0.044 | 0.083        | 46               |
| 202672_s_at | ATF3      | 678           | 525.9  | 582             | 501.9  | 0.9        | 0.374 | 0.451        | 226           | 225.1  | 193             | 151.7  | 0.2        | 0.870 | 0.895        | 47               |
| 201291_s_at | TOP2A     | 187           | 89.2   | 731             | 469.4  | -7.2       | 0.000 | 0.000        | 25            | 6.1    | 107             | 78.4   | -7.1       | 0.000 | 0.000        | 48               |
| 208478_s_at | BAX       | 189           | 93.0   | 388             | 133.8  | -4.0       | 0.001 | 0.002        | 34            | 6.0    | 60              | 19.0   | -6.0       | 0.000 | 0.000        | 49               |
| 211833_s_at | BAX       | 187           | 104.6  | 499             | 184.3  | -4.7       | 0.000 | 0.001        | 28            | 2.7    | 70              | 27.1   | -8.8       | 0.000 | 0.000        | 50               |
| 204315_s_at | GTSE1     | 161           | 79.5   | 275             | 126.8  | -3.6       | 0.001 | 0.002        | 41            | 2.8    | 59              | 19.9   | -4.8       | 0.000 | 0.000        | 51               |
| 204318_s_at | GTSE1     | 143           | 97.5   | 328             | 133.7  | -4.7       | 0.000 | 0.000        | 42            | 3.3    | 72              | 32.6   | -5.2       | 0.000 | 0.000        | 52               |
| 204566_at   | PPM1D     | 247           | 72.2   | 266             | 103.2  | -0.5       | 0.592 | 0.681        | 42            | 11.1   | 39              | 11.2   | 0.9        | 0.396 | 0.473        | 53               |
| 215551_at   | ESR1      | 194           | 69.1   | 234             | 78.5   | -1.9       | 0.061 | 0.116        | 29            | 2.3    | 29              | 2.2    | -0.5       | 0.607 | ---          | 54               |
| 208000_at   | GML       | 282           | 126.1  | 275             | 83.3   | -0.2       | 0.841 | 0.887        | 55            | 11.3   | 57              | 8.2    | -0.6       | 0.564 | 0.632        | 55               |
| 205225_at   | ESR1      | 320           | 173.6  | 212             | 84.8   | 3.2        | 0.002 | 0.006        | 98            | 27.7   | 53              | 8.8    | 6.9        | 0.000 | 0.000        | 56               |
| 201109_s_at | THBS1     | 331           | 896.3  | 187             | 237.8  | 0.3        | 0.759 | 0.822        | 25            | 2.2    | 34              | 18.6   | -3.1       | 0.006 | 0.015        | 57               |
| 201110_s_at | THBS1     | 161           | 393.3  | 197             | 219.0  | -2.2       | 0.031 | 0.064        | 17            | 3.2    | 27              | 18.9   | -3.1       | 0.005 | ---          | 58               |
| 203684_s_at | BCL2      | 57            | 58.6   | 45              | 26.4   | 0.1        | 0.941 | ---          | 81            | 13.4   | 82              | 11.5   | -0.2       | 0.846 | 0.882        | 59               |
| 211235_s_at | ESR1      | 67            | 49.6   | 38              | 25.2   | 3.5        | 0.001 | ---          | 62            | 9.0    | 73              | 12.7   | -2.8       | 0.008 | 0.019        | 60               |
| 221936_x_at | MRPL41    | 44            | 40.6   | 33              | 11.6   | 0.8        | 0.443 | ---          | 107           | 15.1   | 110             | 18.1   | -0.5       | 0.650 | 0.707        | 61               |
| 205385_at   | MDM2      | 48            | 26.7   | 54              | 34.5   | -0.6       | 0.575 | ---          | 48            | 6.7    | 47              | 8.1    | 0.7        | 0.513 | 0.593        | 62               |
| 219273_at   | CCNK      | 37            | 12.1   | 41              | 18.1   | -0.8       | 0.416 | ---          | 41            | 3.2    | 42              | 5.8    | -0.5       | 0.631 | ---          | 63               |
| 206083_at   | BAI1      | 51            | 28.2   | 89              | 55.5   | -2.6       | 0.011 | 0.027        | 65            | 7.8    | 65              | 17.7   | 0.4        | 0.674 | 0.723        | 64               |
| 211233_x_at | ESR1      | 71            | 63.5   | 78              | 41.6   | -1.5       | 0.146 | 0.219        | 91            | 16.6   | 91              | 16.1   | 0.0        | 0.992 | 0.992        | 65               |
| 211234_x_at | ESR1      | 52            | 20.0   | 61              | 26.5   | -1.5       | 0.142 | ---          | 65            | 8.9    | 70              | 9.6    | -1.5       | 0.157 | 0.228        | 66               |
| 216914_at   | CDC25C    | 67            | 49.7   | 85              | 51.5   | -1.9       | 0.063 | 0.118        | 49            | 9.5    | 52              | 7.4    | -1.2       | 0.240 | 0.328        | 67               |
| 204317_at   | GTSE1     | 66            | 46.5   | 147             | 87.0   | -4.0       | 0.000 | 0.001        | 30            | 1.7    | 40              | 10.6   | -4.1       | 0.000 | 0.002        | 68               |
| 217010_s_at | CDC25C    | 90            | 63.2   | 110             | 57.9   | -1.6       | 0.122 | 0.194        | 36            | 6.7    | 39              | 4.4    | -1.6       | 0.115 | ---          | 69               |
| 204859_s_at | APAF1     | 175           | 136.6  | 145             | 45.0   | 0.1        | 0.894 | 0.917        | 28            | 3.3    | 24              | 2.9    | 3.8        | 0.001 | ---          | 70               |
| 205167_s_at | CDC25C    | 151           | 63.1   | 186             | 54.3   | -2.4       | 0.019 | 0.043        | 33            | 2.1    | 44              | 19.0   | -3.5       | 0.002 | 0.006        | 71               |
| 215552_s_at | ESR1      | 146           | 63.9   | 125             | 51.4   | 0.5        | 0.614 | 0.694        | 34            | 2.8    | 36              | 3.7    | -1.3       | 0.194 | ---          | 72               |

| AffyID      | Gene Name | Dataset 1     |        |                 |        |              |       |              | Dataset 2     |        |                 |        |              |       |              | Heatmap Order*** |
|-------------|-----------|---------------|--------|-----------------|--------|--------------|-------|--------------|---------------|--------|-----------------|--------|--------------|-------|--------------|------------------|
|             |           | Benign (n=18) |        | Melanoma (n=45) |        | t Statistic* | p     | Adjusted p** | Benign (n=14) |        | Melanoma (n=19) |        | t Statistic* | p     | Adjusted p** |                  |
|             |           | Mean          | StdDev | Mean            | StdDev |              |       |              | Mean          | StdDev | Mean            | StdDev |              |       |              |                  |
| 209993_at   | ABCB1     | 142           | 85.4   | 128             | 52.1   | 0.0          | 0.974 | 0.981        | 28            | 3.3    | 27              | 4.9    | 0.6          | 0.554 | ---          | 73               |
| 211553_x_at | APAF1     | 104           | 56.4   | 122             | 65.5   | -1.2         | 0.228 | 0.308        | 27            | 2.4    | 26              | 1.2    | 0.7          | 0.466 | ---          | 74               |
| 215425_at   | BTG3      | 202           | 84.0   | 103             | 55.0   | 5.0          | 0.000 | 0.000        | 31            | 5.8    | 22              | 1.5    | 5.9          | 0.000 | ---          | 75               |
| 217373_x_at | MDM2      | 184           | 79.6   | 140             | 71.3   | 1.8          | 0.074 | 0.125        | 22            | 2.0    | 25              | 3.9    | -3.0         | 0.006 | ---          | 76               |
| 215942_s_at | GTSE1     | 117           | 58.5   | 180             | 101.1  | -2.4         | 0.018 | 0.041        | 37            | 3.6    | 46              | 10.7   | -3.3         | 0.003 | 0.008        | 77               |
| 214732_at   | SP1       | 169           | 104.6  | 115             | 64.0   | 1.7          | 0.085 | 0.142        | 38            | 4.6    | 41              | 4.9    | -1.5         | 0.133 | ---          | 78               |
| 209994_s_at | ABCB1     | 96            | 100.1  | 195             | 82.4   | -4.0         | 0.001 | 0.002        | 41            | 11.0   | 42              | 20.7   | 0.3          | 0.770 | 0.814        | 79               |
| 201044_x_at | DUSP1     | 250           | 484.4  | 41              | 111.9  | 2.4          | 0.025 | 0.056        | 59            | 16.4   | 69              | 21.1   | -1.7         | 0.099 | 0.160        | 80               |
| 206859_s_at | PAEP      | 22            | 8.6    | 225             | 1316.6 | -2.3         | 0.027 | 0.058        | 33            | 2.7    | 371             | 733.0  | -2.6         | 0.016 | 0.036        | 81               |
| 201107_s_at | THBS1     | 46            | 107.5  | 20              | 7.7    | 0.6          | 0.537 | ---          | 34            | 2.1    | 38              | 5.1    | -2.9         | 0.007 | ---          | 82               |
| 221576_at   | GDF15     | 11            | 6.7    | 18              | 14.2   | -2.9         | 0.006 | ---          | 28            | 1.4    | 34              | 6.3    | -5.1         | 0.000 | 0.000        | 83               |
| 211832_s_at | MDM2      | 26            | 26.8   | 27              | 19.7   | -0.4         | 0.665 | ---          | 28            | 1.6    | 29              | 1.5    | -2.6         | 0.014 | ---          | 84               |
| 208461_at   | HIC1      | 24            | 28.3   | 32              | 42.6   | -1.4         | 0.161 | ---          | 23            | 2.2    | 26              | 6.3    | -1.9         | 0.068 | ---          | 85               |
| 215443_at   | TSHR      | 36            | 51.6   | 40              | 52.7   | -0.9         | 0.365 | ---          | 29            | 2.9    | 31              | 2.5    | -1.6         | 0.127 | ---          | 86               |
| 210055_at   | TSHR      | 42            | 51.0   | 34              | 38.6   | 0.3          | 0.751 | ---          | 23            | 2.6    | 23              | 1.7    | 0.6          | 0.585 | ---          | 87               |
| 214146_s_at | PPBP      | 126           | 363.6  | 42              | 33.2   | 0.3          | 0.776 | ---          | 26            | 2.3    | 35              | 23.5   | -1.6         | 0.118 | 0.186        | 88               |
| 205386_s_at | MDM2      | 81            | 51.0   | 68              | 49.4   | 0.9          | 0.365 | ---          | 15            | 1.3    | 15              | 1.0    | 0.0          | 0.988 | ---          | 89               |
| 220402_at   | P53AIP1   | 151           | 67.9   | 66              | 37.7   | 4.3          | 0.000 | 0.000        | 28            | 3.2    | 22              | 1.5    | 7.2          | 0.000 | ---          | 90               |
| 207538_at   | IL4       | 53            | 31.1   | 51              | 39.1   | 1.2          | 0.241 | ---          | 20            | 1.0    | 21              | 1.6    | -0.9         | 0.393 | ---          | 91               |
| 207849_at   | IL2       | 49            | 53.5   | 45              | 37.7   | -0.6         | 0.557 | ---          | 16            | 0.7    | 16              | 0.9    | -0.5         | 0.597 | ---          | 92               |
| 211627_x_at | ESR1      | 46            | 45.0   | 40              | 39.7   | 1.1          | 0.270 | ---          | 14            | 0.6    | 15              | 1.3    | -1.9         | 0.065 | ---          | 93               |
| 207539_s_at | IL4       | 26            | 29.2   | 17              | 19.6   | 1.9          | 0.068 | ---          | 22            | 1.5    | 21              | 1.3    | 0.6          | 0.539 | ---          | 94               |
| 215442_s_at | TSHR      | 21            | 21.7   | 18              | 20.3   | 0.6          | 0.528 | ---          | 17            | 0.7    | 18              | 0.9    | -2.3         | 0.030 | ---          | 95               |
| 220403_s_at | P53AIP1   | 406           | 329.2  | 37              | 37.0   | 10.0         | 0.000 | 0.000        | 81            | 26.7   | 33              | 4.1    | 9.6          | 0.000 | 0.000        | 96               |
| 209260_at   | SFN       | 6640          | 3028.3 | 1089            | 3162.9 | 8.6          | 0.000 | 0.000        | 762           | 415.6  | 182             | 313.8  | 6.6          | 0.000 | 0.000        | 97               |

\* A natural log transformation was done prior to the calculation of the test statistic.

\*\* Genes that have "---" for the adjusted p-value were removed prior to the adjustment. For Dataset 1, removed genes that had a range less than 75 or mean of less than 75 for all samples. For Dataset 2, the removed genes that had a range of less than 30 or mean of less than 30 for all samples.

\*\*\* From top to bottom of heat map
